# Supplementary material for: A near-infrared and two-photon dual-mode fluorescent probe for the colorimetric monitoring of SO2in vitro and in vivo
Source: Royal Society of Chemistry journal article supplement (doi:10.1039/c9an00515c), 2019-01-01
Supplement: c9an00515c1.pdf [file c9an00515c1.pdf]

*Supporting information for*

**A near-infrared and two-photon dual-mode fluorescent probe  
for colorimetric monitoring SO<sub>2</sub> *in vitro* and *in vivo***

Xiuqi Kong, Min Li, Baoli Dong, Nan Zhang, Wenhui Song, Yaru Lu and Weiyin Lin\*

Institute of Fluorescent Probes for Biological Imaging, School of Chemistry and Chemical  
Engineering, School of Materials Science and Engineering, University of Jinan, Jinan, Shandong  
250022, P. R. China

E-mail: [weiyinlin2013@163.com](mailto:weiyinlin2013@163.com)

## Table of contents

|               | Page |
|---------------|------|
| Fig. S1 ..... | S3   |
| Fig. S2.....  | S3   |
| Fig. S3.....  | S4   |
| Fig. S4.....  | S5   |
| Fig. S5.....  | S6   |
| Fig. S6.....  | S6   |
| Fig. S7.....  | S7   |
| Fig. S8.....  | S8   |
| Fig. S9.....  | S9   |
| Fig.S10.....  | S9   |
| Fig.S11.....  | 10   |
| Fig.S12.....  | 10   |

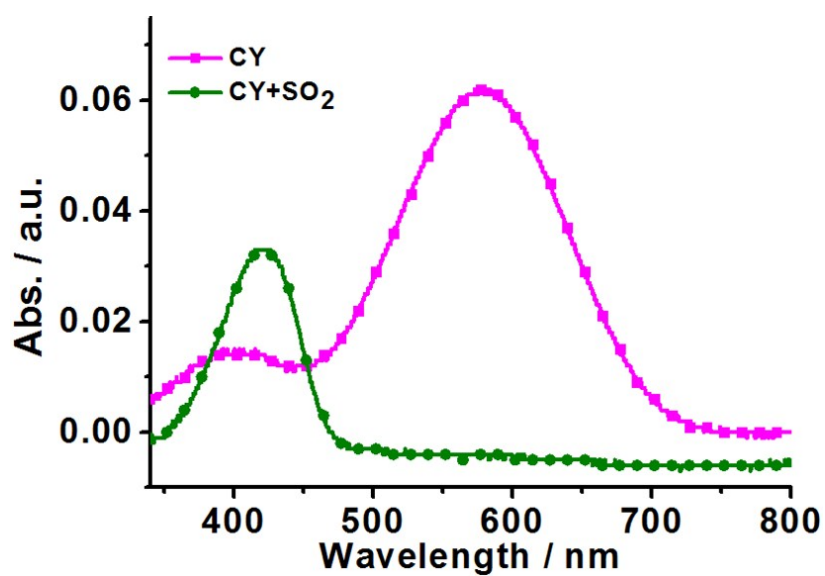

**Fig. S1.** The absorption spectra of fluorescent probe CY in the presence or absence of SO<sub>2</sub>.

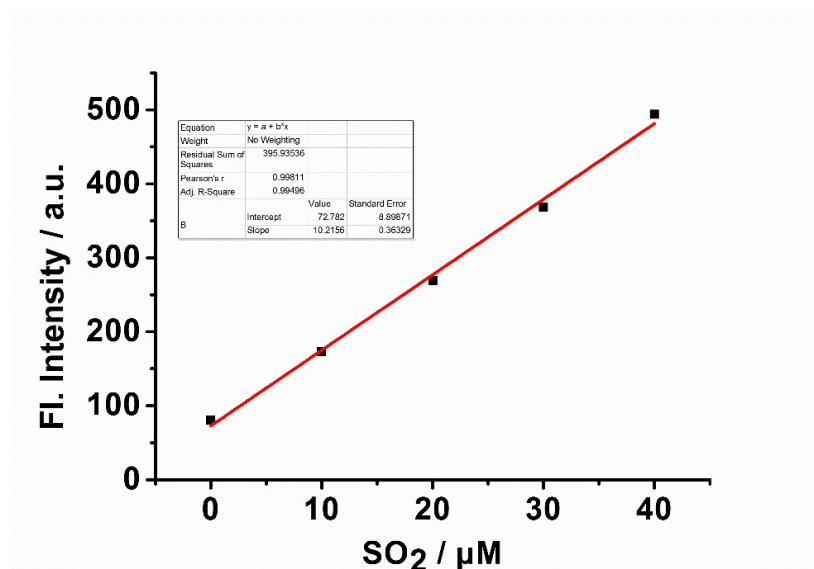

**Fig. S2.** Linear fit of the fluorescence intensity change at 500 nm with NaHSO<sub>3</sub> (0 – 40 μM) excited at 420 nm.

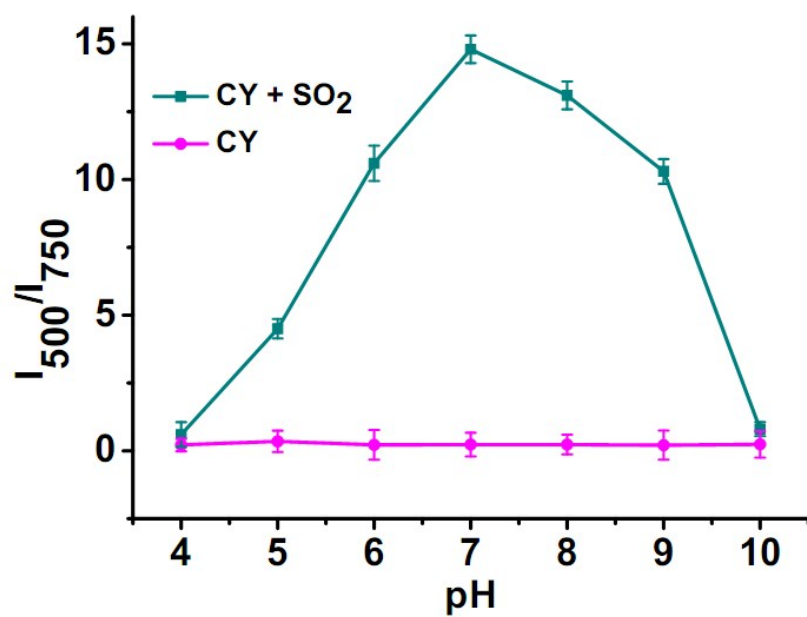

**Fig. S3.** The fluorescent intensities ( $I_{500}/I_{750}$ ) of **CY** in the presence or absence of  $\text{NaHSO}_3$  under various pH (pH = 4.0-10.0) conditions.

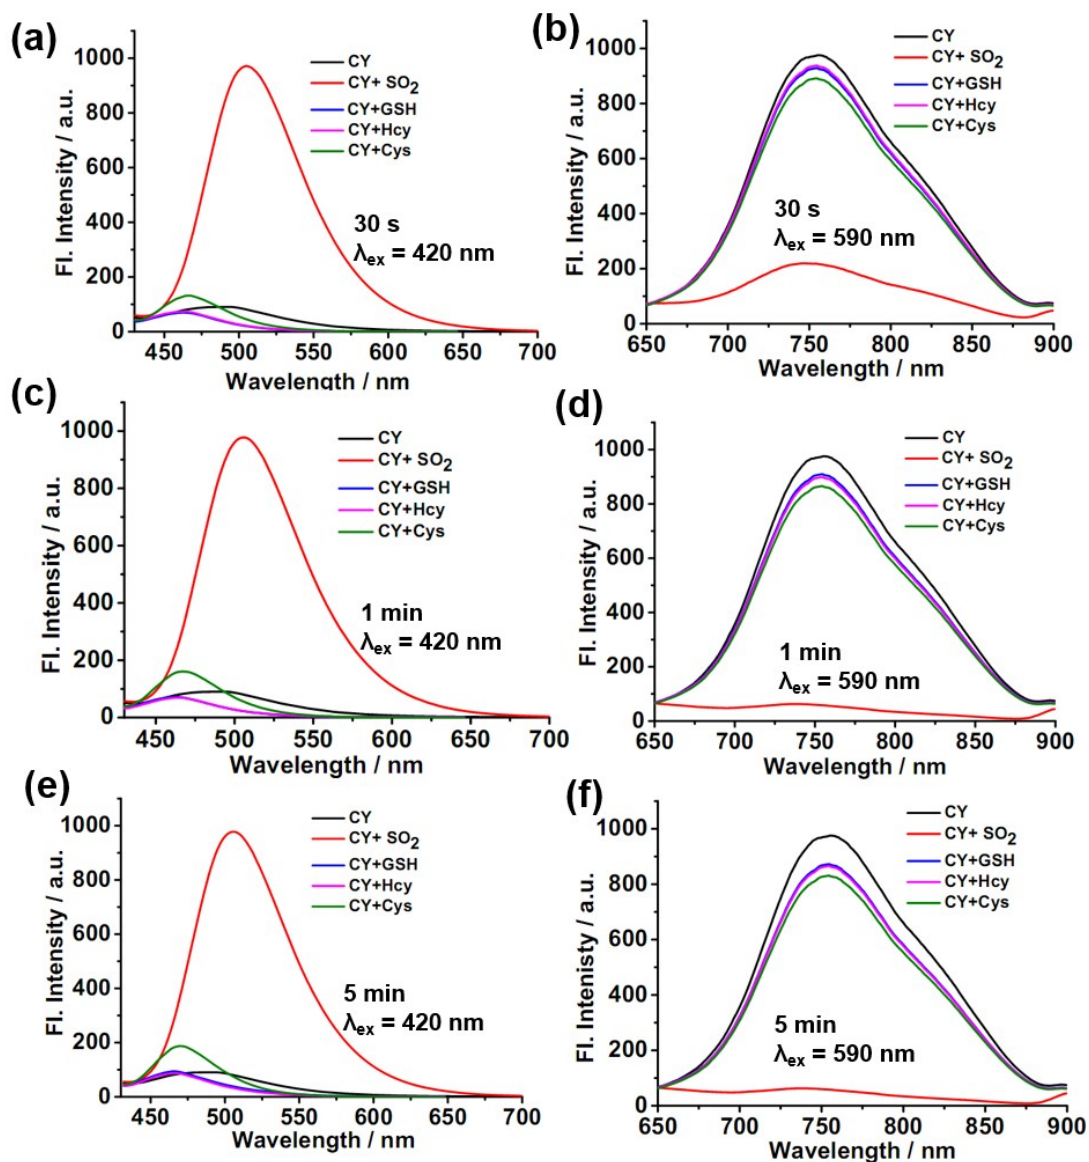

**Fig. S4.** The time-dependent fluorescent curves of **CY** in the presence or absence of  $\text{NaHSO}_3$  (100  $\mu\text{M}$ ),  $\text{GSH}$ (100  $\mu\text{M}$ ),  $\text{Cys}$ (100  $\mu\text{M}$ ) and  $\text{Hcy}$ (100  $\mu\text{M}$ ) in Hepes buffers(pH 7.4, with 50% acetonitrile). (a,b) 10 $\mu\text{M}$  **CY** encountered with  $\text{NaHSO}_3$ ,  $\text{GSH}$ ,  $\text{Cys}$  and  $\text{Hcy}$  for 30s; (c,d) 10 $\mu\text{M}$  **CY** encountered with  $\text{NaHSO}_3$ ,  $\text{GSH}$ ,  $\text{Cys}$  and  $\text{Hcy}$  for 1 min; (e,f) 10 $\mu\text{M}$  **CY** encountered with  $\text{NaHSO}_3$ ,  $\text{GSH}$ ,  $\text{Cys}$  and  $\text{Hcy}$  for 5 min.  $\lambda_{\text{ex}} = 420 \text{ nm}$ (slit (nm) 5/5),  $\lambda_{\text{em}} = 430 - 700 \text{ nm}$  and  $\lambda_{\text{ex}} = 590 \text{ nm}$ (slit (nm) 10/10),  $\lambda_{\text{em}} = 650 - 900 \text{ nm}$ .

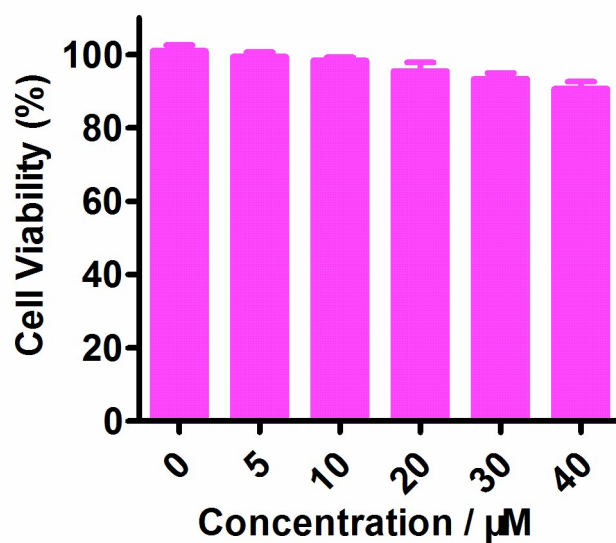

**Fig. S5.** Cell viability of HepG2 cells treated with different concentrations (0-40  $\mu\text{M}$ ) of CY for 24 h.

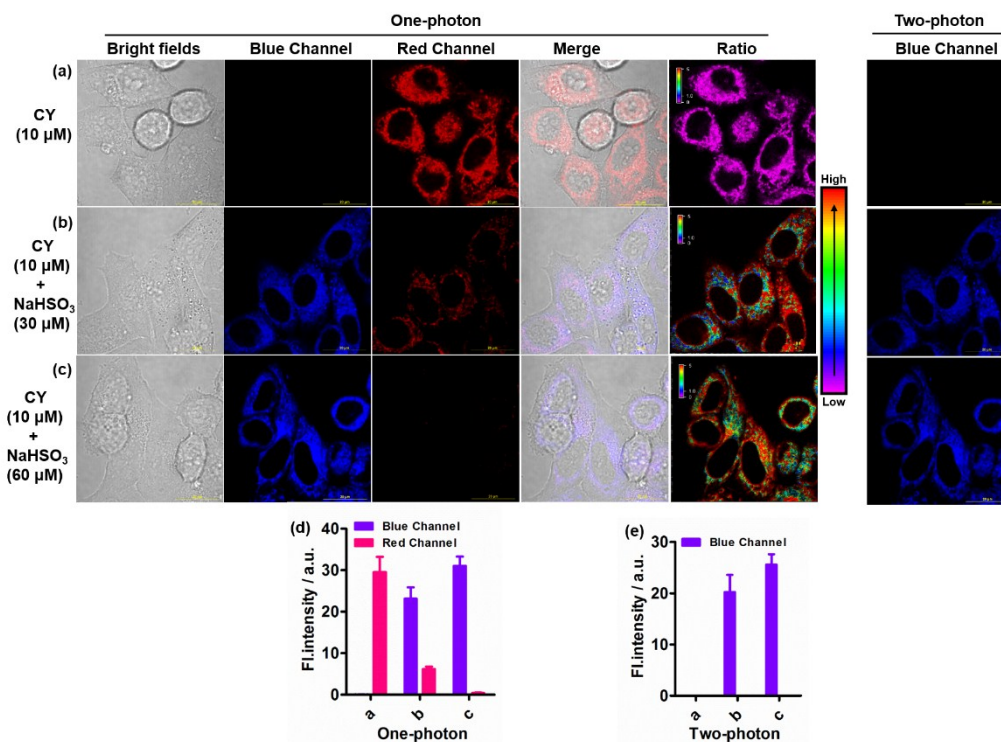

**Fig. S6.** NIR and two-photon images for detecting exogenous  $\text{SO}_2$  in HepG2 cells with probe CY. (a) HepG2 cells incubated with 10  $\mu\text{M}$  free CY for 30 min; (b) cells were firstly incubated with 10  $\mu\text{M}$  CY for 30 min, and then treated with  $\text{NaHSO}_3$  (30  $\mu\text{M}$ ) for another 30 min; (c) cells were incubated with 10  $\mu\text{M}$  CY for 30 min and then treated with  $\text{NaHSO}_3$  (60  $\mu\text{M}$ ) for another 30 min.

treated with NaHSO<sub>3</sub> (60 μM) for another 30 min; (d,e) quantified fluorescence intensities of groups a, b, c and d in Blue and Red channel respectively under one- and two-photon modes with Images J. software. Error bars represent standard deviation ( $\pm$ S.D.), n = 3, the statistical analysis was performed from three separate biological replicates. One-photon mode: Blue Channel:  $\lambda_{\text{ex}}$  = 404 nm,  $\lambda_{\text{em}}$  = 425-475 nm, Red Channel:  $\lambda_{\text{ex}}$  = 640 nm,  $\lambda_{\text{em}}$  = 663-738nm; two-photon mode:  $\lambda_{\text{ex}}$  = 800 nm,  $\lambda_{\text{em}}$  = 425-475 nm. Scale bar: 20 μm.

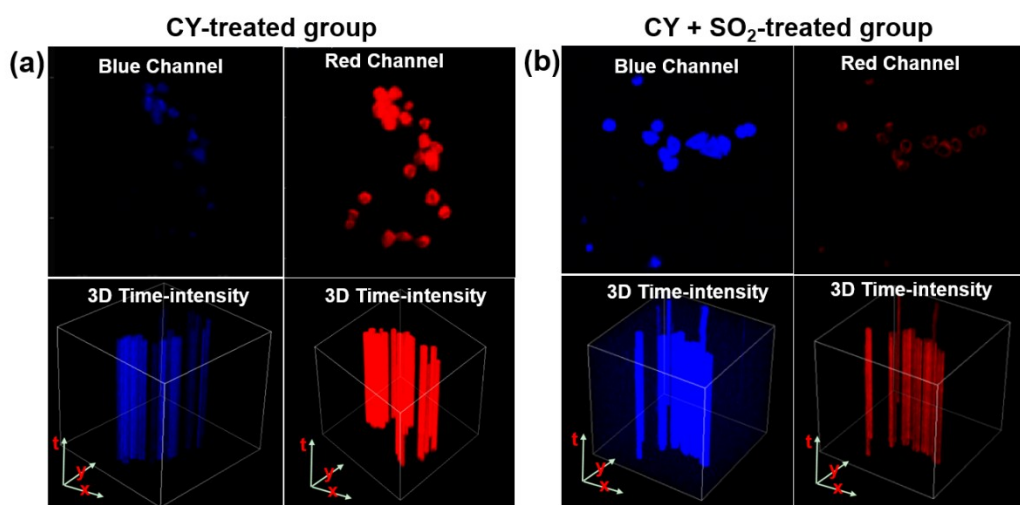

**Fig. S7.** Fluorescence images for detecting exogenous SO<sub>2</sub> in HepG2 cells with probe **CY** after continuous irradiation for 25 min. (a) HepG2 cells incubated with 10 μM free **CY** for 30 min, and then irradiation for 25 min; (b) cells were firstly incubated with 10 μM **CY** for 30 min, and then treated with NaHSO<sub>3</sub> (60 μM) for another 30 min, followed by irradiation for 25 min. Upper row of a and b: the representative images in blue and red channels at 12 min with irradiation; bottom row of a and b: 3D time-dependent fluorescence images after 30 min irradiation in blue and red channels respectively. Blue Channel:  $\lambda_{\text{ex}}$  = 404 nm,  $\lambda_{\text{em}}$  = 425-475 nm, Red Channel:  $\lambda_{\text{ex}}$  = 640 nm,  $\lambda_{\text{em}}$  = 663-738nm.

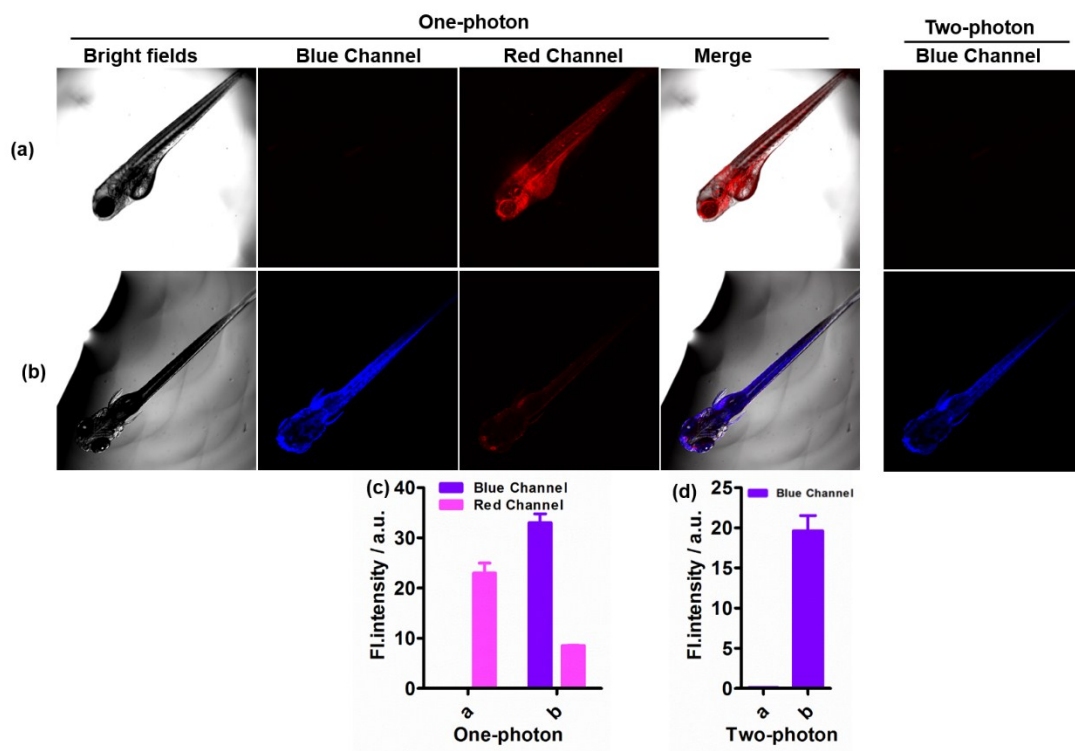

**Fig. S8.** NIR and two-photon fluorescence images for imaging SO<sub>2</sub> in zebrafish with 10  $\mu$ M CY. (a) zebrafish were treated with free 10  $\mu$ M CY for 30 min; (b) zebrafish were pre-treated with 10  $\mu$ M CY for 30 min, and then treated with NaHSO<sub>3</sub> (30  $\mu$ M) for another 30 min. (c) quantified fluorescence intensities of groups a and b Blue and Red channel respectively under one- and two-photon modes with Images J. software. Error bars represent standard deviation ( $\pm$ S.D.), n = 3, the statistical analysis was performed from three separate biological replicates. One-photon mode: Blue Channel:  $\lambda_{\text{ex}}$  = 404 nm,  $\lambda_{\text{em}}$  = 425-475 nm, Red Channel:  $\lambda_{\text{ex}}$  = 640 nm,  $\lambda_{\text{em}}$  = 663-738nm; two-photon mode:  $\lambda_{\text{ex}}$  = 800 nm,  $\lambda_{\text{em}}$  = 425-475 nm. Scale bar: 20  $\mu$ m.

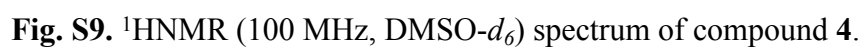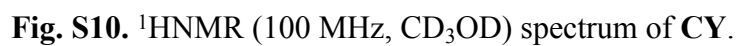

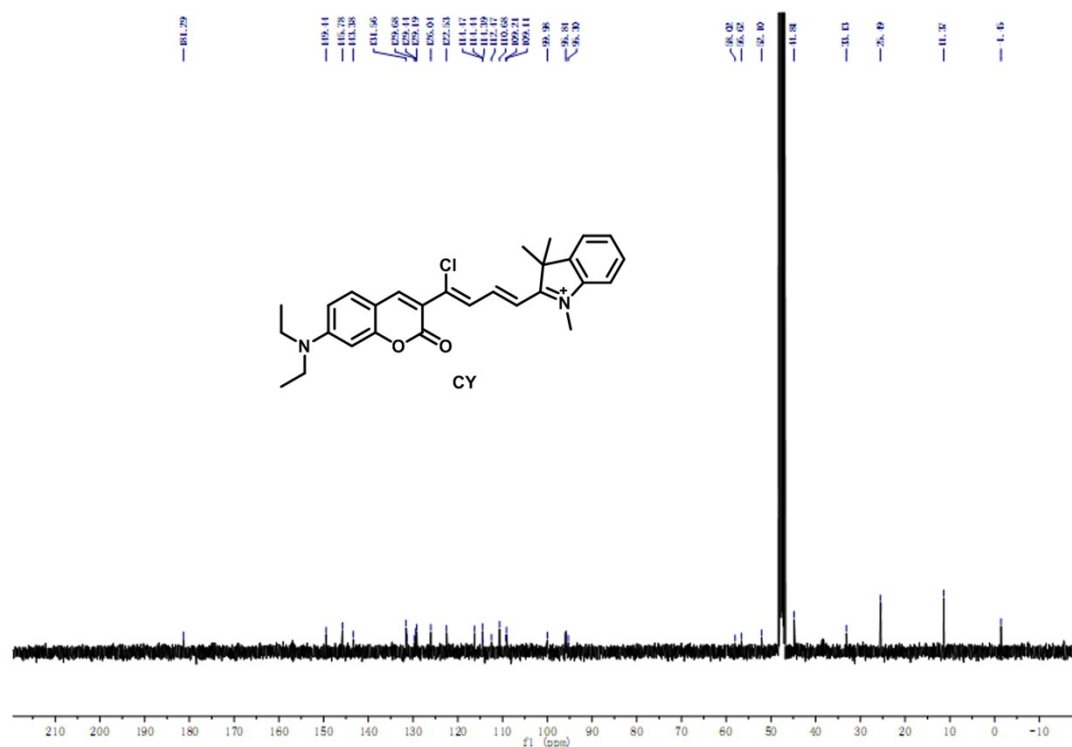

**Fig. S11.** <sup>13</sup>CNMR (100 MHz, CD<sub>3</sub>OD) spectrum of **CY**.

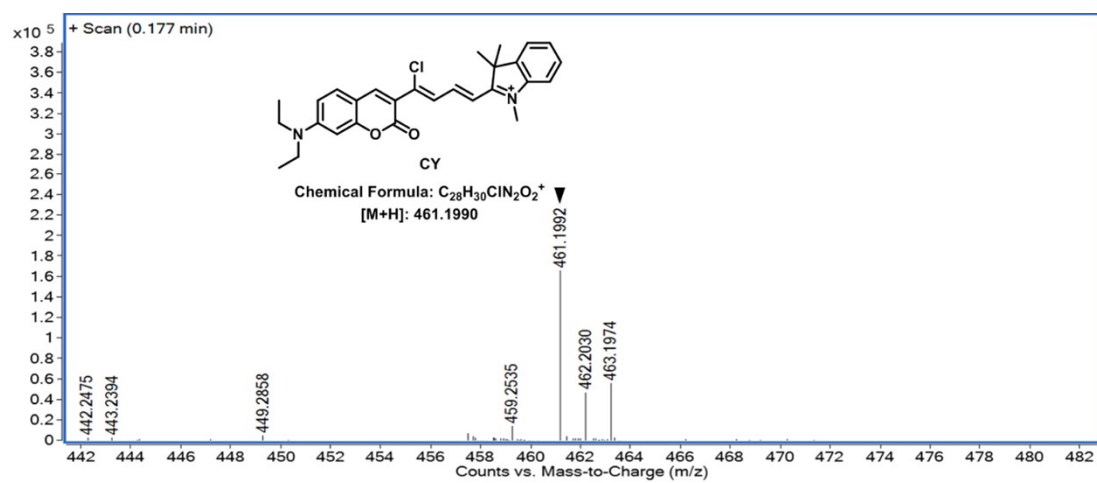

**Fig. S12.** HRMS spectrum of **CY**.
